# Supplementary material for: Comparative genomic analysis of Streptomyces rapamycinicus NRRL 5491 and its mutant overproducing rapamycin
Source: PubMed Central journal article supplement (PMC9206652; doi:10.1038/s41598-022-14199-6), 2022-06-18
Supplement: 41598_2022_14199_MOESM1_ESM.pdf [file 41598_2022_14199_MOESM1_ESM.pdf]

## Supplementary Information

### Comparative genomic analysis of *Streptomyces rapamycinicus* NRRL 5491 and its mutant overproducing rapamycin

Hee-Geun Jo<sup>1,4</sup>, Joshua Julio Adidjaja<sup>2,4</sup>, Do-Kyung Kim<sup>1</sup>, Bu-Soo Park<sup>1</sup>, Namil Lee<sup>3</sup>, Byung-Kwan Cho<sup>3</sup>, Hyun Uk Kim<sup>2\*</sup> and Min-Kyu Oh<sup>1\*</sup>

<sup>1</sup>Department of Chemical and Biological Engineering, Korea University, Seoul 02841, Republic of Korea

<sup>2</sup>Department of Chemical and Biomolecular Engineering (BK21 four), Korea Advanced Institute of Science and Technology (KAIST), Daejeon 34141, Republic of Korea

<sup>3</sup>Department of Biological Sciences, Korea Advanced Institute of Science and Technology (KAIST), Daejeon 34141, Republic of Korea

<sup>4</sup>Hee-Geun Jo and Joshua Julio Adidjaja contributed equally to this work

\*email: [ehukim@kaist.ac.kr](mailto:ehukim@kaist.ac.kr); [mkoh@korea.ac.kr](mailto:mkoh@korea.ac.kr)

## Supplementary Figures

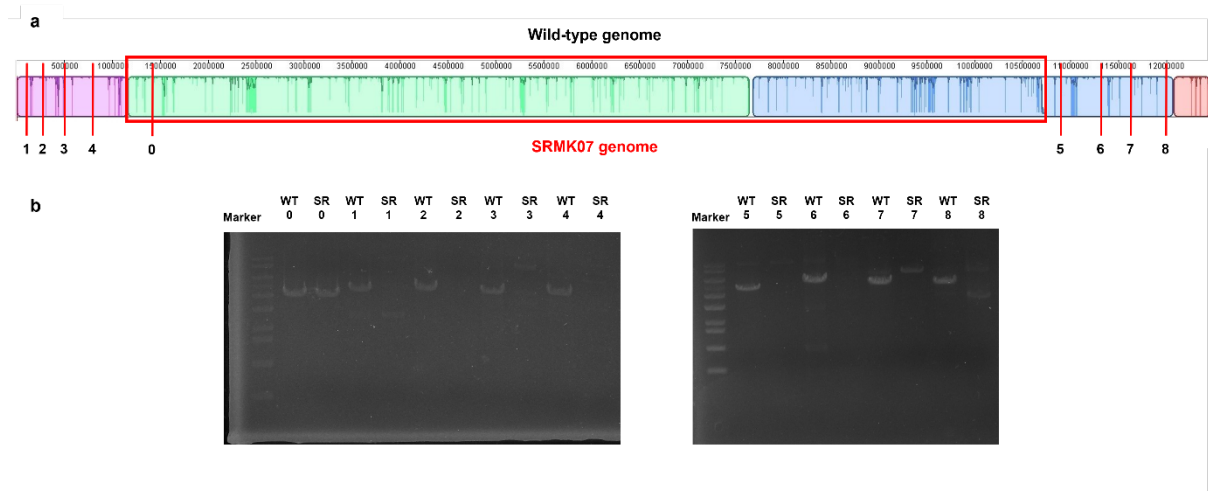

**Supplementary Figure S1.** PCR experiments to verify the potentially deleted regions in the SRMK07 strain's genome. (a) Location of primers (numbers '1' to '8') for the PCR experiments in the SRMK07 strain's genome. A red rectangle in the middle indicates the region where the genomes of the wild-type and the SRMK07 strain overlap. The region '0' has consistent sequences in both genomes of NRRL 5491 and SRMK07 as a positive control. The primer sequences are available in Supplementary Table S1, and each set of primers was designed to generate a product size of 4 to 5 kb. (b) Results of the PCR experiments. The target bands were observed only from the wild-type gDNA ('WT'). 'SR' indicates the results from the SRMK07 strain's gDNA.

## Supplementary Tables

**Supplementary Table S1.** Primer sequences for PCR experiments to verify the potentially deleted regions in the SRMK07 genome.

| Primer name <sup>a</sup> | Sequence             |
|--------------------------|----------------------|
| Set0_Fwd                 | CCTCCGCGTATCTCAAGAAG |
| Set0_Rev                 | GAGGCGGTGCTCTATCTCAC |
| Set1_Fwd                 | GCTCCCACCAGAACCTCTC  |
| Set1_Rev                 | TCCTCTGGACGAACTCAACC |
| Set2_Fwd                 | CTGTCCGTCTTCCCCTACAC |
| Set2_Rev                 | GGGGCTCTCGTAGATGTCTG |
| Set3_Fwd                 | ACATCGACTTCACCGATTCC |
| Set3_Rev                 | ACCGTCACTTCTCCGTCAAC |
| Set4_Fwd                 | GGTCATGCTCACTCCATCCT |
| Set4_Rev                 | CACACTGCGCTTGTACTCGT |
| Set5_Fwd                 | CAATTCCCAGGATTGACTGG |
| Set5_Rev                 | CGCACAGCTCCAGGTAGTAA |
| Set6_Fwd                 | CTCATCGACCTCTCCGTACC |
| Set6_Rev                 | GGCTCGATCTTCGTGTTCTC |
| Set7_Fwd                 | GGCGCTTGTAGACACTCACA |
| Set7_Rev                 | TCTACCACCCCAACTTCGAG |
| Set8_Fwd                 | GGCAACAACAAGTGGAAGGT |
| Set8_Rev                 | GCGAGAACAAGAGGATCGAC |

<sup>a</sup> Suffixes 'Fwd' and 'Rev' indicate forward and reverse primers for each gene, respectively.

**Supplementary Table S2.** Primer sequences for qPCR experiments to verify the potentially duplicated region in the SRMK07 genome.

| <b>Primer name<sup>a</sup></b> | <b>Sequence</b>       |
|--------------------------------|-----------------------|
| R1_Fwd                         | CGCAGAAGGAAGACATCGTA  |
| R1_Rev                         | CGACGAGGACGAGGAGATAC  |
| R2_Fwd                         | GTACAAGCCGATCGAGAAGG  |
| R2_Rev                         | CTTCACGCACACCACCTG    |
| R3_Fwd                         | ACTTCCTGGCCTTCCTCAAT  |
| R3_Rev                         | TGTAGATGTCCTGCCATTCCG |
| R4_Fwd                         | GGTACACCATCCCCATTAC   |
| R4_Rev                         | CTGCTCCATGCCTTCTTCTC  |
| R5_Fwd                         | GGCTCTACGAGCTGATCTGG  |
| R5_Rev                         | GATCTTGACGGTGACCGAGT  |
| T1_Fwd                         | ATGTCGTGCTGAACTCGTTG  |
| T1_Rev                         | GATCACGGATGTCGGTCTTG  |
| T2_Fwd                         | ATCTGCTGGAGGAACTGTCCG |
| T2_Rev                         | CTCCCACTCGTAGGAGAACC  |
| T3_Fwd                         | ATGCAGACCAAGTTCTGTG   |
| T3_Rev                         | CTGATCAGCCGATCCATCAT  |
| T4_Fwd                         | GATGGGAGCTGTGGATCG    |
| T4_Rev                         | CGTGCATCTCGAAGTACGC   |
| T5_Fwd                         | GTGTTTCGTGAACGTGGACAG |
| T5_Rev                         | GACGGCCCTTCTCTATGAGG  |
| T6_Fwd                         | GCCCACTACCTGCACACC    |
| T6_Rev                         | GGTCGACCACCAGCAGTC    |
| T7_Fwd                         | TCGATGTCCTGGTCAACAAC  |
| T7_Rev                         | ACTCGAAATTGAGGGCGAAC  |
| T8_Fwd                         | GAGATGGCCTCCCGCTAT    |
| T8_Rev                         | GCATGGTGATGTCCTGTTTG  |

<sup>a</sup> Suffixes 'Fwd' and 'Rev' indicate forward and reverse primers for each gene, respectively.

**Supplementary Table S3.** Futasosine biosynthetic genes in *Streptomyces coelicolor* and their corresponding locations in the genomes of *Streptomyces rapamycinicus* NRRL 5491 and SRMK07.

| <b><i>Streptomyces coelicolor</i></b> | <b><i>Streptomyces rapamycinicus</i><br/>NRRL 5491</b> | <b><i>Streptomyces rapamycinicus</i><br/>SRMK07</b> |
|---------------------------------------|--------------------------------------------------------|-----------------------------------------------------|
| <i>sco4506</i><br>( <i>mqnA</i> )     | 5,444,627 - 5,445,445<br>(NJMEEBPL_04454)              | 4,269,599 - 4,270,417<br>(JDDNEILB_04407)           |
| <i>sco4327</i><br>( <i>mqnB</i> )     | 6,736,979 - 6,737,806<br>(NJMEEBPL_05641)              | 5,561,924 - 5,562,751<br>(JDDNEILB_03218)           |
| <i>sco4550</i><br>( <i>mqnC</i> )     | 5,441,425 - 5,442,624<br>(NJMEEBPL_04452)              | 4,266,397 - 4,267,596<br>(JDDNEILB_04409)           |
| <i>sco4326</i><br>( <i>mqnD</i> )     | 6,736,092 - 6,736,982<br>(NJMEEBPL_05640)              | 5,561,037 - 5,561,927<br>(JDDNEILB_03219)           |
| <i>sco4556</i>                        | 5,440,229 - 5,440,876<br>(NJMEEBPL_04450)              | 4,265,201 - 4,265,848<br>(JDDNEILB_04411)           |
| <i>sco4491</i>                        | 5,467,321 - 5,468,244<br>(NJMEEBPL_04480)              | 4,292,293 - 4,293,216<br>(JDDNEILB_04381)           |
| <i>sco4490</i>                        | 5,468,241 - 5,469,692<br>(NJMEEBPL_04481)              | 4,293,213 - 4,294,664<br>(JDDNEILB_04380)           |
| <i>sco4492</i>                        | 5,466,565 - 5,467,296<br>(NJMEEBPL_04479)              | 4,291,537 - 4,292,268<br>(JDDNEILB_04382)           |

**Supplementary Table S4.** Predicted growth of *Streptomyces rapamycinicus* NRRL 5491 using its genome-scale metabolic model SrapWT2040 under different carbon sources.

| Carbon source       | Exchange reaction ID | Experimental phenotype <sup>a</sup> | Predicted phenotype |
|---------------------|----------------------|-------------------------------------|---------------------|
| D-Fructose          | EX_fru_e             | +                                   | +                   |
| D-Glucose           | EX_glc__D_e          | +                                   | +                   |
| Glycerol            | EX_glyc_e            | +                                   | +                   |
| Maltose             | EX_malt_e            | +                                   | +                   |
| D-Mannitol          | EX_mnl_e             | +                                   | +                   |
| D-Mannose           | EX_man_e             | +                                   | +                   |
| Raffinose           | EX_raffin_e          | +                                   | +                   |
| L-Rhamnose          | EX_rmn_e             | +                                   | +                   |
| D-Ribose            | EX_rib__D_e          | +                                   | +                   |
| Trehalose           | EX_tre_e             | +                                   | +                   |
| D-Xylose            | EX_xyl__D_e          | +                                   | +                   |
| L-Arabinose         | EX_arab__L_e         | +                                   | +                   |
| Inositol            | EX_inost_e           | +                                   | -                   |
| $\alpha$ -D-Lactose | EX_lcts_e            | +                                   | +                   |
| Salicin             | EX_salcn_e           | +                                   | +                   |
| Glucosamine         | EX_gam_e             | -                                   | -                   |
| D-Sorbitol          | EX_sbt__D_e          | -                                   | +                   |

<sup>a</sup> Data taken from Kumar and Goodfellow <sup>1</sup>.

**Supplementary Table S5.** Predicted growth of *Streptomyces rapamycinicus* NRRL 5491 using its genome-scale metabolic model SrapWT2040 under different nitrogen sources.

| <b>Nitrogen source</b> | <b>Exchange reaction ID</b> | <b>Experimental phenotype<sup>a</sup></b> | <b>Predicted phenotype</b> |
|------------------------|-----------------------------|-------------------------------------------|----------------------------|
| L-Arginine             | EX_arg__L_e                 | +                                         | +                          |
| L-Asparagine           | EX_asn__L_e                 | +                                         | +                          |
| L-Glutamic acid        | EX_glu__L_e                 | +                                         | +                          |
| L-Histidine            | EX_his__L_e                 | +                                         | +                          |
| L-isoleucine           | EX_ile__L_e                 | +                                         | +                          |
| L-Ornithine            | EX_orn_e                    | +                                         | +                          |
| L-Proline              | EX_pro__L_e                 | +                                         | +                          |
| L-Threonine            | EX_thr__L_e                 | +                                         | +                          |
| α-Alanine              | EX_ala__D_e                 | +                                         | +                          |
| L-Alanine              | EX_ala__L_e                 | +                                         | +                          |
| L-Glycine              | EX_gly_e                    | -                                         | +                          |
| DL-Methionine          | EX_met__L_e                 | +                                         | -                          |
| L-Phenylalanine        | EX_phe__L_e                 | +                                         | +                          |
| L-Serine               | EX_ser__L_e                 | +                                         | +                          |
| L-tryptophan           | EX_trp__L_e                 | -                                         | +                          |
| L-Valine               | EX_val__L_e                 | +                                         | +                          |
| L-Aminobutyric acid    | EX_4abut_e                  | -                                         | +                          |
| DL-Aspartic acid       | EX_asp__L_e                 | -                                         | +                          |
| L-Leucine              | EX_leu__L_e                 | -                                         | +                          |

<sup>a</sup> Data taken from Kumar and Goodfellow <sup>1</sup>.

## **Supplementary Data**

**Supplementary Data S1.** Genomic information of *Streptomyces rapamycinicus* NRRL 5491 and its mutant, SRMK07, overproducing rapamycin.

**Supplementary Data S2.** Core genes of *Streptomyces rapamycinicus* NRRL 5491 and its mutant, SRMK07, overproducing rapamycin.

**Supplementary Data S3.** Genome-scale metabolic model of *Streptomyces rapamycinicus* NRRL 5491, SrapWT2040, in the Systems Biology Markup Language (SBML) format.

**Supplementary Data S4.** Genome-scale metabolic model of *Streptomyces rapamycinicus* SRMK07, SrapUV2010, in the Systems Biology Markup Language (SBML) format.



## Supplementary References

- 1 Kumar, Y. & Goodfellow, M. Five new members of the *Streptomyces violaceusniger* 16S rRNA gene clade: *Streptomyces castelarensis* sp. nov., comb. nov., *Streptomyces himastatinicus* sp. nov., *Streptomyces mordarskii* sp. nov., *Streptomyces rapamycinicus* sp. nov. and *Streptomyces ruanii* sp. nov. *Int J Syst Evol Microbiol* **58**, 1369-1378. <https://doi.org/10.1099/ijs.0.65408-0> (2008).
